# Supplementary material
Source: Royal Society of Chemistry journal article supplement (doi:10.1039/d6cp00665e)
Supplement: d6cp00665e1.pdf [file d6cp00665e1.pdf]

## Supporting Information

### **Thermodynamic Resilience of Wild-Type p53 DNA-Binding Domain and Its Disruption by the R273H Hotspot Mutation: Insights from REMD Simulations**

Ziqian Zhao, Gang Wang, Zhenyu Qian\*

*Key Laboratory of Exercise and Health Sciences (Ministry of Education), Shanghai  
Frontiers Science Research Base of Exercise and Metabolic Health, and School of  
Exercise and Health, Shanghai University of Sport, 399 Changhai Road, Shanghai  
200438, China*

\*Corresponding author

*Email address: qianzhenyu@sus.edu.cn (Zhenyu Qian)*

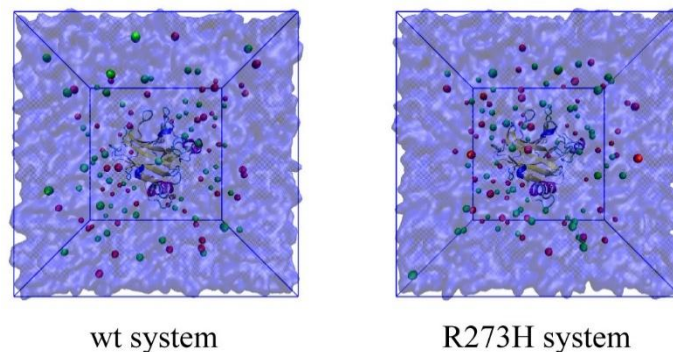

**Fig. S1** Initial states of the wt and R273H systems. The p53DBD-wt/R273H molecules are drawn in New Cartoon method and colored by secondary structures. Water molecules are drawn in Quick Surface method and colored in transparent blue. Solvent  $\text{Na}^+$ , solvent  $\text{Cl}^-$  and the coordinated  $\text{Zn}^{2+}$  ions are depicted as red, green and gray spheres respectively. Boundaries of cubic simulation boxes are shown in blue.

**Table S1** Simulation details of the wt and R273H systems

| Simulated system | Box size ( $\text{nm}^3$ )     | Total duration of simulation | Total number of atoms |
|------------------|--------------------------------|------------------------------|-----------------------|
| p53DBD-wt        | $8.57 \times 8.57 \times 8.57$ | $0.4 \mu\text{s} \times 49$  | 61670                 |
| p53DBD-R273H     | $8.57 \times 8.57 \times 8.57$ | $0.4 \mu\text{s} \times 49$  | 61659                 |

**Temperature lists of REMD simulation:**

**For the wt system:** 310.00 311.35 312.70 314.06 315.42 316.80 318.17 319.54 320.93 322.31 323.70 325.10 326.50 327.90 329.31 330.72 332.14 333.57 334.99 336.42 337.86 339.30 340.75 342.20 343.66 345.12 346.59 348.06 349.54 351.02 352.51 354.00 355.49 356.99 358.50 360.01 361.52 363.04 364.56 366.09 367.63 369.17 370.72 372.27 373.82 375.39 376.95 378.52 380.00

**For the R273H system:** 310.00 311.35 312.70 314.06 315.42 316.80 318.17 319.54 320.93 322.31 323.70 325.10 326.50 327.90 329.31 330.72 332.14 333.57 334.99 336.42 337.86 339.30 340.75 342.20 343.66 345.12 346.59 348.06 349.54 351.02 352.51 354.00 355.49 356.99 358.50 360.01 361.52 363.04 364.56 366.09 367.63 369.17 370.72 372.27 373.82 375.39 376.95 378.52 380.00

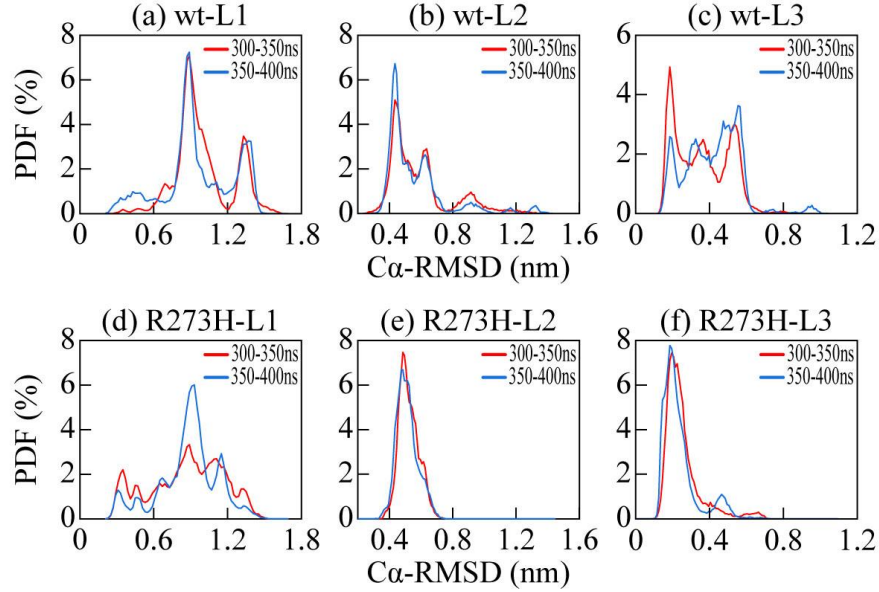

**Fig. S2** Simulation convergence assessment. (a)-(f): Probability density functions (PDF) of  $C\alpha$ -root-mean-square deviation ( $C\alpha$ -RMSD) of L1, L2, and L3 loops for both the wt and R273H systems at 310 K within the time intervals of 300-350 ns (colored in red) and 350-400 ns (colored in blue).

**Table S2** Decomposed Gibbs free energy (kcal/mol) between H2 helix and the three-stranded  $\beta$ -sheet (averaged per residue) at all replica temperatures (K) in the wt system

| Temperature | $\Delta E_{vdW}$ | $\Delta E_{elec}$ | $\Delta E_{MM}$ | $\Delta G_{PB}$ | $\Delta G_{surf-ten}$ | $\Delta G_{total}$ |
|-------------|------------------|-------------------|-----------------|-----------------|-----------------------|--------------------|
| 310.00      | -0.77            | -5.11             | -5.88           | -9.54           | 0.46                  | -14.96             |
| 311.35      | -0.76            | -5.00             | -5.76           | -9.54           | 0.47                  | -14.84             |
| 312.70      | -0.77            | -5.06             | -5.83           | -9.54           | 0.47                  | -14.90             |
| 314.06      | -0.76            | -5.05             | -5.81           | -9.57           | 0.47                  | -14.92             |
| 315.42      | -0.77            | -5.03             | -5.79           | -9.65           | 0.47                  | -14.97             |
| 316.80      | -0.76            | -4.98             | -5.74           | -9.69           | 0.47                  | -14.96             |
| 318.17      | -0.76            | -4.96             | -5.72           | -9.69           | 0.47                  | -14.95             |
| 319.54      | -0.75            | -4.93             | -5.68           | -9.74           | 0.47                  | -14.95             |
| 320.93      | -0.75            | -5.03             | -5.78           | -9.67           | 0.47                  | -14.99             |
| 322.31      | -0.75            | -4.99             | -5.74           | -9.75           | 0.47                  | -15.02             |
| 323.70      | -0.73            | -4.95             | -5.68           | -9.80           | 0.47                  | -15.01             |
| 325.10      | -0.76            | -5.09             | -5.85           | -9.75           | 0.47                  | -15.14             |
| 326.50      | -0.75            | -5.03             | -5.78           | -9.76           | 0.47                  | -15.07             |
| 327.90      | -0.74            | -4.94             | -5.69           | -9.77           | 0.47                  | -14.98             |
| 329.31      | -0.75            | -5.01             | -5.76           | -9.72           | 0.47                  | -15.01             |
| 330.72      | -0.76            | -5.04             | -5.80           | -9.77           | 0.47                  | -15.10             |
| 332.14      | -0.75            | -4.99             | -5.74           | -9.75           | 0.47                  | -15.01             |
| 333.57      | -0.73            | -4.93             | -5.66           | -9.87           | 0.47                  | -15.06             |
| 334.99      | -0.73            | -5.02             | -5.76           | -9.83           | 0.47                  | -15.11             |
| 336.42      | -0.74            | -5.03             | -5.77           | -9.88           | 0.47                  | -15.18             |

|        |       |       |       |        |      |        |
|--------|-------|-------|-------|--------|------|--------|
| 337.86 | -0.74 | -5.01 | -5.75 | -9.87  | 0.47 | -15.15 |
| 339.30 | -0.73 | -4.94 | -5.67 | -9.86  | 0.47 | -15.05 |
| 340.75 | -0.72 | -4.89 | -5.61 | -9.93  | 0.48 | -15.07 |
| 342.20 | -0.73 | -4.87 | -5.60 | -9.90  | 0.47 | -15.03 |
| 343.66 | -0.73 | -4.91 | -5.64 | -9.90  | 0.47 | -15.06 |
| 345.12 | -0.73 | -4.80 | -5.53 | -9.94  | 0.48 | -14.99 |
| 346.59 | -0.71 | -4.84 | -5.55 | -9.93  | 0.48 | -15.01 |
| 348.06 | -0.73 | -4.97 | -5.70 | -9.85  | 0.47 | -15.08 |
| 349.54 | -0.72 | -4.87 | -5.59 | -9.91  | 0.47 | -15.03 |
| 351.02 | -0.72 | -4.82 | -5.54 | -9.93  | 0.47 | -15.00 |
| 352.51 | -0.71 | -4.86 | -5.57 | -9.94  | 0.47 | -15.04 |
| 354.00 | -0.73 | -4.84 | -5.57 | -9.90  | 0.47 | -14.99 |
| 355.49 | -0.72 | -4.93 | -5.66 | -9.94  | 0.48 | -15.12 |
| 356.99 | -0.72 | -4.71 | -5.43 | -9.97  | 0.48 | -14.92 |
| 358.50 | -0.71 | -4.76 | -5.46 | -9.98  | 0.48 | -14.96 |
| 360.01 | -0.70 | -4.64 | -5.34 | -10.00 | 0.48 | -14.87 |
| 361.52 | -0.70 | -4.62 | -5.32 | -10.05 | 0.48 | -14.89 |
| 363.04 | -0.71 | -4.71 | -5.42 | -10.11 | 0.48 | -15.04 |
| 364.56 | -0.69 | -4.70 | -5.40 | -10.08 | 0.48 | -14.99 |
| 366.09 | -0.70 | -4.74 | -5.44 | -10.05 | 0.48 | -15.01 |
| 367.63 | -0.69 | -4.69 | -5.38 | -10.07 | 0.48 | -14.96 |
| 369.17 | -0.70 | -4.78 | -5.48 | -10.04 | 0.48 | -15.05 |
| 370.72 | -0.69 | -4.65 | -5.34 | -10.03 | 0.48 | -14.89 |
| 372.27 | -0.69 | -4.69 | -5.38 | -10.05 | 0.48 | -14.96 |
| 373.82 | -0.70 | -4.78 | -5.48 | -10.03 | 0.48 | -15.03 |
| 375.39 | -0.69 | -4.80 | -5.48 | -10.09 | 0.48 | -15.09 |
| 376.95 | -0.69 | -4.69 | -5.38 | -10.05 | 0.48 | -14.95 |
| 378.52 | -0.69 | -4.62 | -5.31 | -10.04 | 0.48 | -14.87 |
| 380.00 | -0.70 | -4.72 | -5.43 | -10.00 | 0.48 | -14.95 |

**Table S3** Decomposed Gibbs free energy (kcal/mol) between H2 helix and the three-stranded  $\beta$ -sheet (averaged per residue) at all replica temperatures (K) in the R273H system

| Temperature | $\Delta E_{\text{vdW}}$ | $\Delta E_{\text{elec}}$ | $\Delta E_{\text{MM}}$ | $\Delta G_{\text{PB}}$ | $\Delta G_{\text{surf-ten}}$ | $\Delta G_{\text{total}}$ |
|-------------|-------------------------|--------------------------|------------------------|------------------------|------------------------------|---------------------------|
| 310.00      | -0.82                   | -2.64                    | -3.46                  | -9.29                  | 0.46                         | -12.29                    |
| 311.35      | -0.81                   | -2.68                    | -3.48                  | -9.26                  | 0.46                         | -12.29                    |
| 312.70      | -0.80                   | -2.64                    | -3.45                  | -9.24                  | 0.46                         | -12.23                    |
| 314.06      | -0.80                   | -2.68                    | -3.48                  | -9.37                  | 0.46                         | -12.39                    |
| 315.42      | -0.80                   | -2.67                    | -3.47                  | -9.35                  | 0.46                         | -12.36                    |
| 316.80      | -0.78                   | -2.57                    | -3.36                  | -9.44                  | 0.46                         | -12.33                    |
| 318.17      | -0.80                   | -2.69                    | -3.49                  | -9.32                  | 0.46                         | -12.36                    |
| 319.54      | -0.79                   | -2.67                    | -3.46                  | -9.37                  | 0.46                         | -12.38                    |
| 320.93      | -0.78                   | -2.68                    | -3.46                  | -9.40                  | 0.46                         | -12.40                    |

---

|        |       |       |       |       |      |        |
|--------|-------|-------|-------|-------|------|--------|
| 322.31 | -0.78 | -2.62 | -3.41 | -9.45 | 0.46 | -12.39 |
| 323.70 | -0.76 | -2.52 | -3.28 | -9.50 | 0.46 | -12.31 |
| 325.10 | -0.75 | -2.50 | -3.25 | -9.57 | 0.47 | -12.36 |
| 326.50 | -0.76 | -2.53 | -3.29 | -9.48 | 0.46 | -12.30 |
| 327.90 | -0.75 | -2.53 | -3.28 | -9.52 | 0.47 | -12.34 |
| 329.31 | -0.75 | -2.51 | -3.26 | -9.55 | 0.47 | -12.34 |
| 330.72 | -0.72 | -2.40 | -3.12 | -9.64 | 0.47 | -12.29 |
| 332.14 | -0.72 | -2.39 | -3.10 | -9.65 | 0.47 | -12.28 |
| 333.57 | -0.73 | -2.44 | -3.17 | -9.62 | 0.47 | -12.31 |
| 334.99 | -0.71 | -2.36 | -3.07 | -9.74 | 0.47 | -12.34 |
| 336.42 | -0.70 | -2.34 | -3.04 | -9.74 | 0.47 | -12.31 |
| 337.86 | -0.72 | -2.41 | -3.12 | -9.71 | 0.47 | -12.36 |
| 339.30 | -0.71 | -2.35 | -3.06 | -9.76 | 0.47 | -12.34 |
| 340.75 | -0.71 | -2.41 | -3.12 | -9.76 | 0.47 | -12.41 |
| 342.20 | -0.69 | -2.36 | -3.05 | -9.74 | 0.47 | -12.31 |
| 343.66 | -0.69 | -2.28 | -2.97 | -9.84 | 0.47 | -12.33 |
| 345.12 | -0.68 | -2.27 | -2.94 | -9.79 | 0.48 | -12.26 |
| 346.59 | -0.67 | -2.26 | -2.93 | -9.82 | 0.48 | -12.27 |
| 348.06 | -0.66 | -2.19 | -2.85 | -9.86 | 0.48 | -12.23 |
| 349.54 | -0.69 | -2.28 | -2.97 | -9.75 | 0.47 | -12.24 |
| 351.02 | -0.67 | -2.21 | -2.88 | -9.81 | 0.48 | -12.21 |
| 352.51 | -0.66 | -2.21 | -2.87 | -9.82 | 0.48 | -12.22 |
| 354.00 | -0.67 | -2.24 | -2.90 | -9.85 | 0.48 | -12.28 |
| 355.49 | -0.67 | -2.24 | -2.91 | -9.77 | 0.48 | -12.20 |
| 356.99 | -0.66 | -2.19 | -2.84 | -9.91 | 0.48 | -12.27 |
| 358.50 | -0.65 | -2.18 | -2.82 | -9.81 | 0.48 | -12.15 |
| 360.01 | -0.66 | -2.22 | -2.88 | -9.86 | 0.48 | -12.27 |
| 361.52 | -0.64 | -2.17 | -2.81 | -9.90 | 0.48 | -12.23 |
| 363.04 | -0.64 | -2.18 | -2.82 | -9.82 | 0.48 | -12.17 |
| 364.56 | -0.66 | -2.26 | -2.92 | -9.83 | 0.48 | -12.28 |
| 366.09 | -0.65 | -2.15 | -2.79 | -9.84 | 0.48 | -12.15 |
| 367.63 | -0.66 | -2.19 | -2.85 | -9.84 | 0.48 | -12.22 |
| 369.17 | -0.64 | -2.18 | -2.83 | -9.93 | 0.48 | -12.28 |
| 370.72 | -0.66 | -2.20 | -2.86 | -9.90 | 0.48 | -12.28 |
| 372.27 | -0.66 | -2.16 | -2.81 | -9.90 | 0.48 | -12.24 |
| 373.82 | -0.65 | -2.25 | -2.89 | -9.84 | 0.48 | -12.26 |
| 375.39 | -0.66 | -2.29 | -2.95 | -9.87 | 0.48 | -12.34 |
| 376.95 | -0.66 | -2.21 | -2.87 | -9.83 | 0.48 | -12.22 |
| 378.52 | -0.63 | -2.20 | -2.83 | -9.89 | 0.48 | -12.24 |
| 380.00 | -0.65 | -2.17 | -2.82 | -9.87 | 0.48 | -12.22 |

---

**Table S4** Statistical metrics for convergence assessment (Pearson’s correlation  $r$ , mean absolute deviation, and root mean square error) of wt and R273H systems from contact probability matrix comparisons between 300–350 ns and 350–400 ns windows

| System | Pearson’s $r$ | MAD    | RMSE   |
|--------|---------------|--------|--------|
| wt     | 0.9965        | 0.0029 | 0.0133 |
| R273H  | 0.9954        | 0.0030 | 0.0154 |

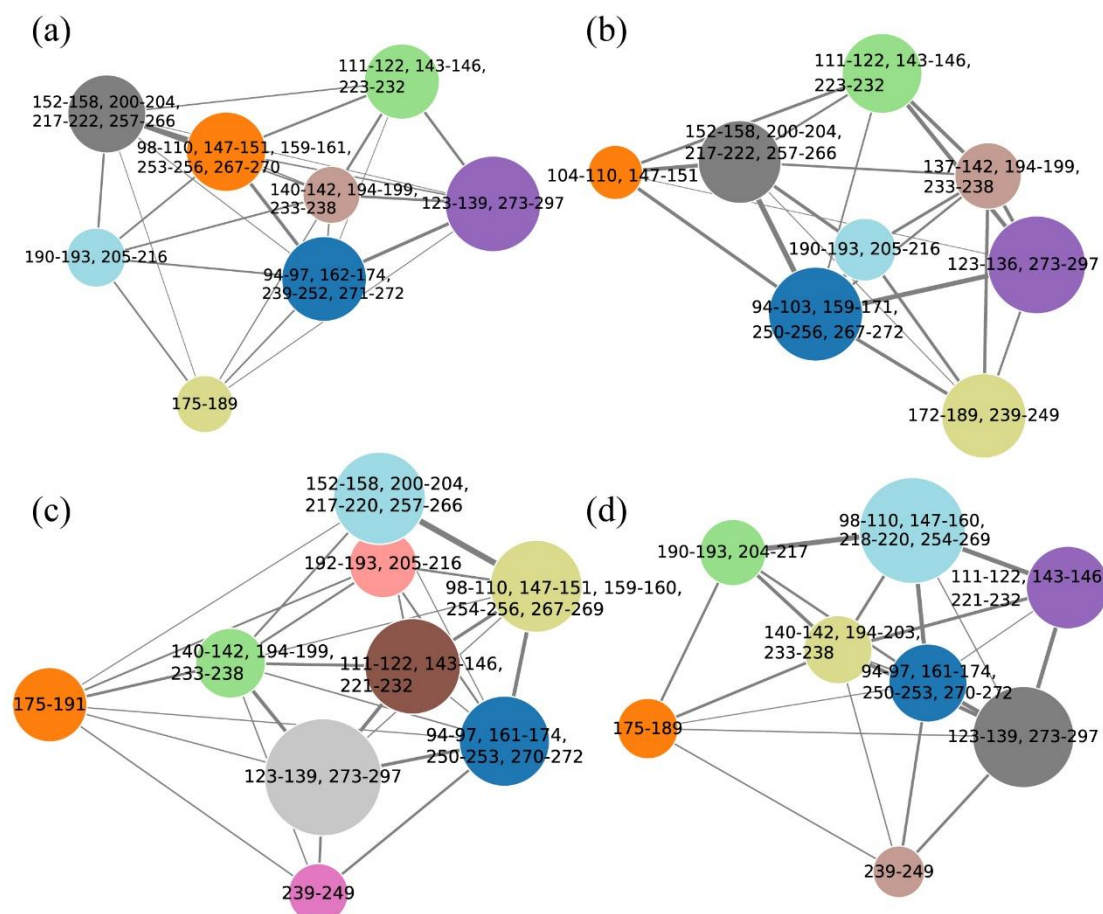

**Fig. S3** Community network comparison between two time windows for convergence assessment of the wt and R273H systems. (a,b) wt system (300–350 ns, 350–400 ns); (c,d) R273H system (300–350 ns, 350–400 ns).
